# Supplementary material for: Sliding Dynamics of Ring Chains on Two Asymmetric/Symmetric Chains in a Simple Slide-Ring Gel
Source: MDPI journal article supplement (doi:10.3390/polym14010079), 2021-12-26
Supplement: s1 [file s1]

## **Supplementary Information**

### **Sliding dynamics of ring chains on two asymmetric/symmetric chains in a simple slide-ring gel**

Jiaxin Wu, Fuchen Guo , Ke Li and Linxi Zhang

### S1 Effects of axial chain length on sliding dynamics

We calculated the diffusion coefficient  $D$  of ring chains sliding along two symmetric fluctuating axial chains, in which we changed the axial chain length from  $N_{\text{axial}}=100$  to  $N_{\text{axial}}=200$  and kept the other parameters unchanged. The dependence of  $D$  on the distance  $d$  between two symmetric axial chains is shown in Figure S1. From Figure S1, we found that there also exists a maximum value for  $D^{\text{max}}$  located at  $d^*=16$ , which is the same as the case of  $N_{\text{axial}}=100$  for ring chains sliding along the symmetric axial chains. Therefore, the similar conclusion can be made for different axial chain lengths.

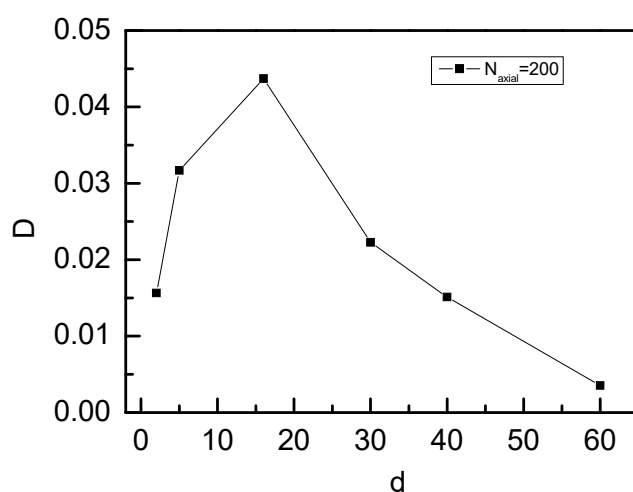

**Figure S1.** Diffusion coefficient  $D$  of ring chains sliding along two symmetric fluctuating axial chains ( $K_1=K_2=0$ ) with different distances  $d$  between two symmetric fluctuating axial chains for  $N_{\text{axial}}=200$ .
